# Supplementary material
Source: Springer Nature journal article supplement (https://www.springermedizin.de/resource/supplementary/12967_2013_1714_MOESM4_ESM.pdf/9574898)
Supplement: MOESM4 [file 9574898]

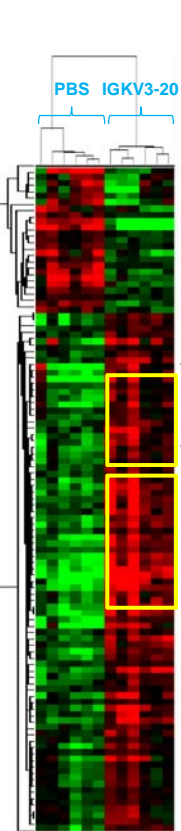

**A**

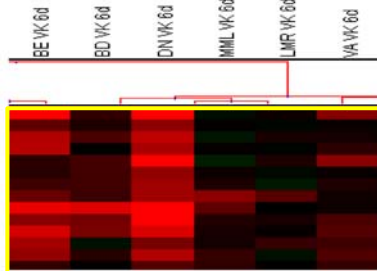

LILRA3; leukocyte immunoglobulin-like receptor, subfamily A (without TM domain), member 3  
 CD82; CD82 molecule  
 CXCL13; chemokine (C-X-C motif) ligand 13  
 SLC7A11; solute carrier family 7, (cationic amino acid transporter, y+ system) member 11  
 CRLF2; cytokine receptor-like factor 2  
 NA; NA  
 TRAF3IP2; TRAF3 interacting protein 2  
 NA; NA  
 C19orf59; chromosome 19 open reading frame 59  
 PDPN; podoplanin  
 S100A9; S100 calcium binding protein A9  
 SERPINA1; serpin peptidase inhibitor, clade A (alpha-1 antiproteinase, antitrypsin), member 1  
 LILRB2; leukocyte immunoglobulin-like receptor, subfamily B (with TM and ITIM domains), member 2  
 LILRB1; leukocyte immunoglobulin-like receptor, subfamily B (with TM and ITIM domains), member 1

**B**

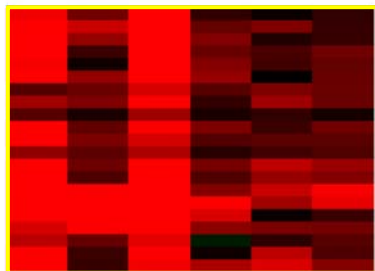

LILRA5; leukocyte immunoglobulin-like receptor, subfamily A (with TM domain), member 5  
 CA12; carbonic anhydrase XII  
 PI3D1; phosphotyrosine interaction domain containing 1  
 CD300E; CD300e molecule  
 NA; NA  
 FCAR; Fc fragment of IgA, receptor for  
 GLTD1; glycosyltransferase 1 domain containing 1  
 FPR1; formyl peptide receptor 1  
 DSE; dermatan sulfate epimerase  
 LILRA1; leukocyte immunoglobulin-like receptor, subfamily A (with TM domain), member 1  
 CLEC4D; C-type lectin domain family 4, member D  
 KREMEN1; kringe containing transmembrane protein 1  
 TNIP3; TNFAIP3 interacting protein 3  
 KCNJ15; potassium inwardly-rectifying channel, subfamily J, member 15  
 THBS1; thrombospondin 1  
 VCAN; versican  
 SLC11A1; solute carrier family 11 (proton-coupled divalent metal ion transporters), member 1  
 ITGB8; integrin, beta 8  
 LILRA6; leukocyte immunoglobulin-like receptor, subfamily A (with TM domain), member 6  
 FPR2; formyl peptide receptor 2  
 CCR2; chemokine (C-C motif) receptor 2
